# Supplementary material for: Oxyfunctionalization of pyridine derivatives using whole cells of Burkholderia sp. MAK1
Source: PubMed Central journal article supplement (PMC5159870; doi:10.1038/srep39129), 2016-12-16
Supplement: srep39129-s1.pdf [file srep39129-s1.pdf]

**Supplementary information for “Oxyfunctionalization of pyridine derivatives using whole cells of *Burkholderia* sp. MAK1”**

Jonita Stankevičiūtė, Justas Vaitekūnas, Vytautas Petkevičius, Renata Gasparavičiūtė, Daiva Tauraitė, Rolandas Meškys

Department of Molecular Microbiology and Biotechnology, Institute of Biochemistry, the Life Sciences Centre, Vilnius University, Sauletekio al. 7, LT-10257 Vilnius, Lithuania

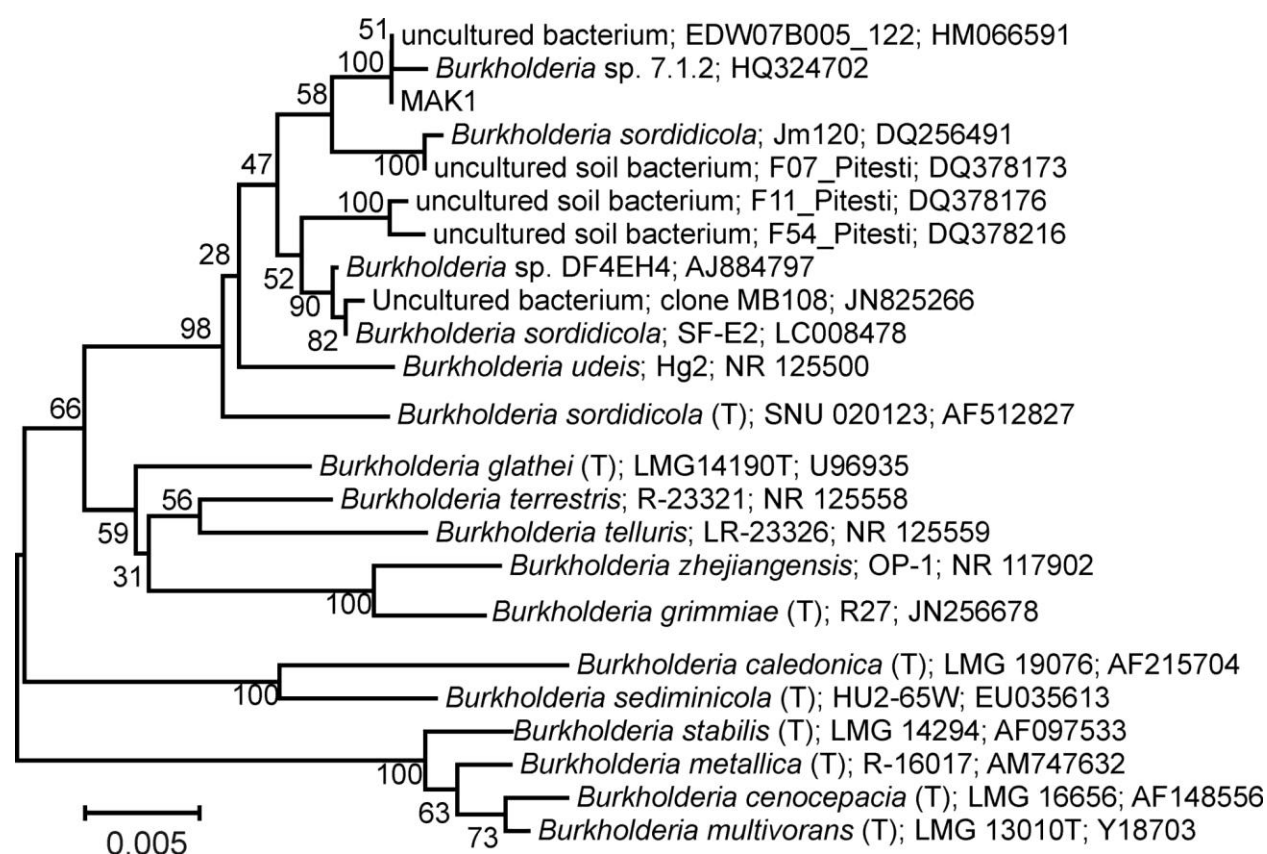

Figure S-I. Phylogenetic tree (constructed using the neighbour-joining method) showing the phylogenetic position of strain MAK1, based on 16S rRNA gene sequences.

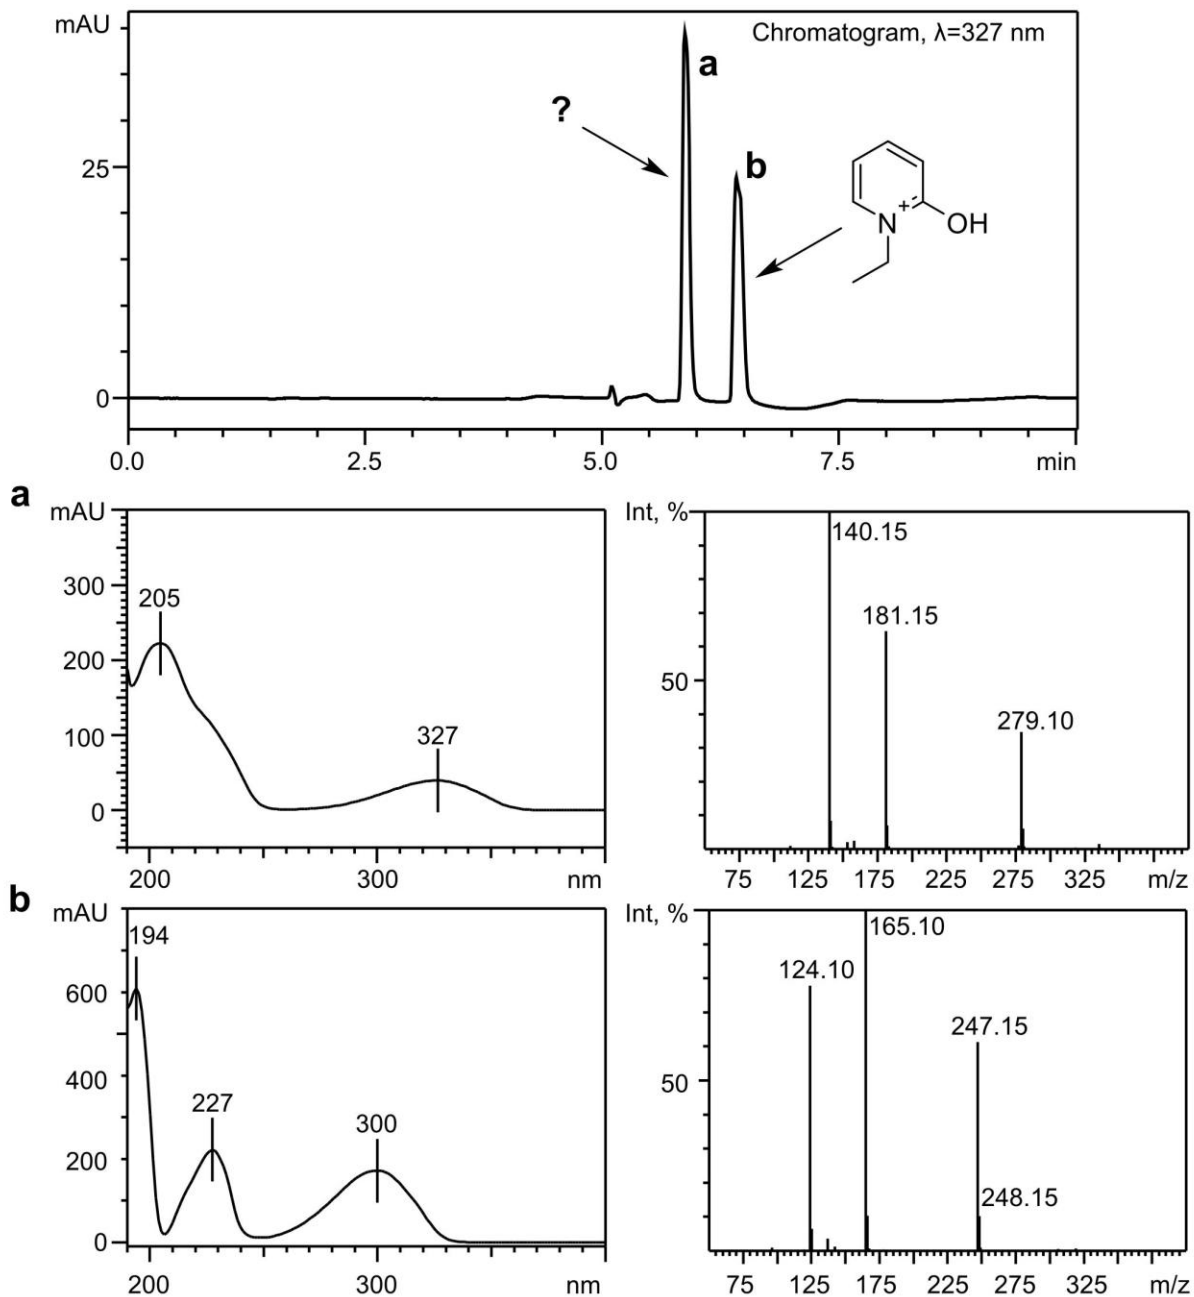

Figure S-II. Transformation of *N*-ethyl-2-hydroxypyridine by *Burkholderia* sp. MAK1. Analysis of the reaction mixture was performed by HPLC-MS. Chromatogram, UV-Vis spectra and mass spectra of (a) the product and (b) the substrate are presented.

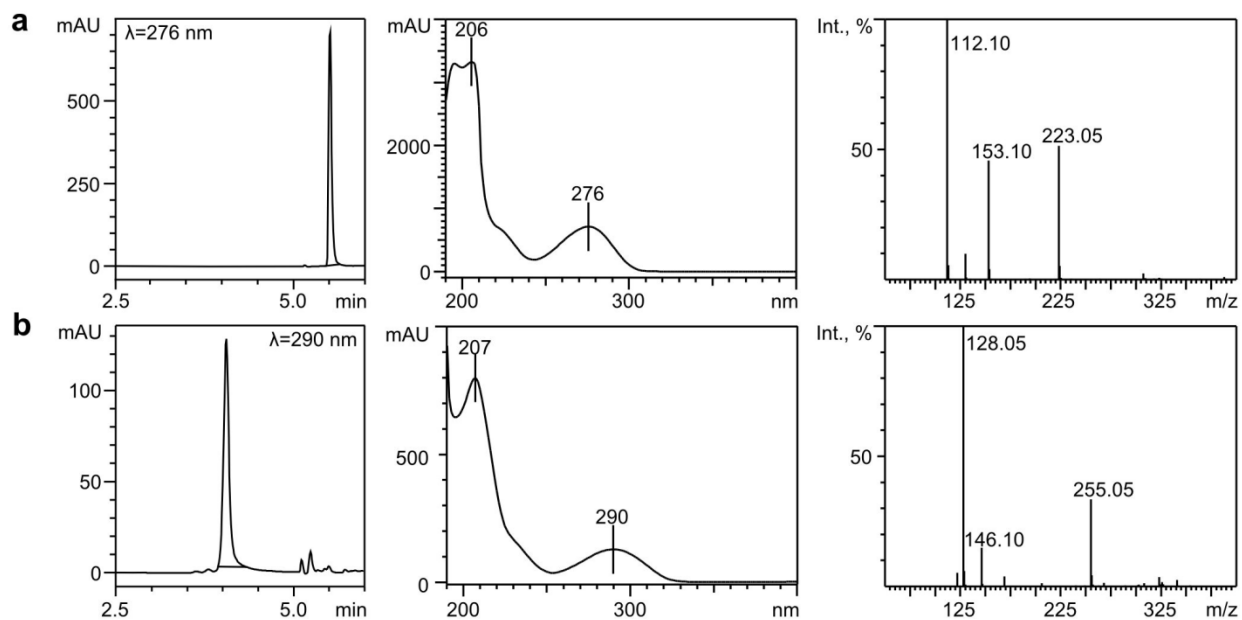

Figure S-III. Regioselective oxidation of 2,4-dihydroxypyridine by the cells of *Burkholderia* sp. MAK1. Analyses of the reaction mixture were performed by HPLC-MS (a) immediately after the addition of the substrate and (b) after 20 hours of incubation at 30 °C. Chromatograms and UV-Vis and mass spectra of the peaks are presented.

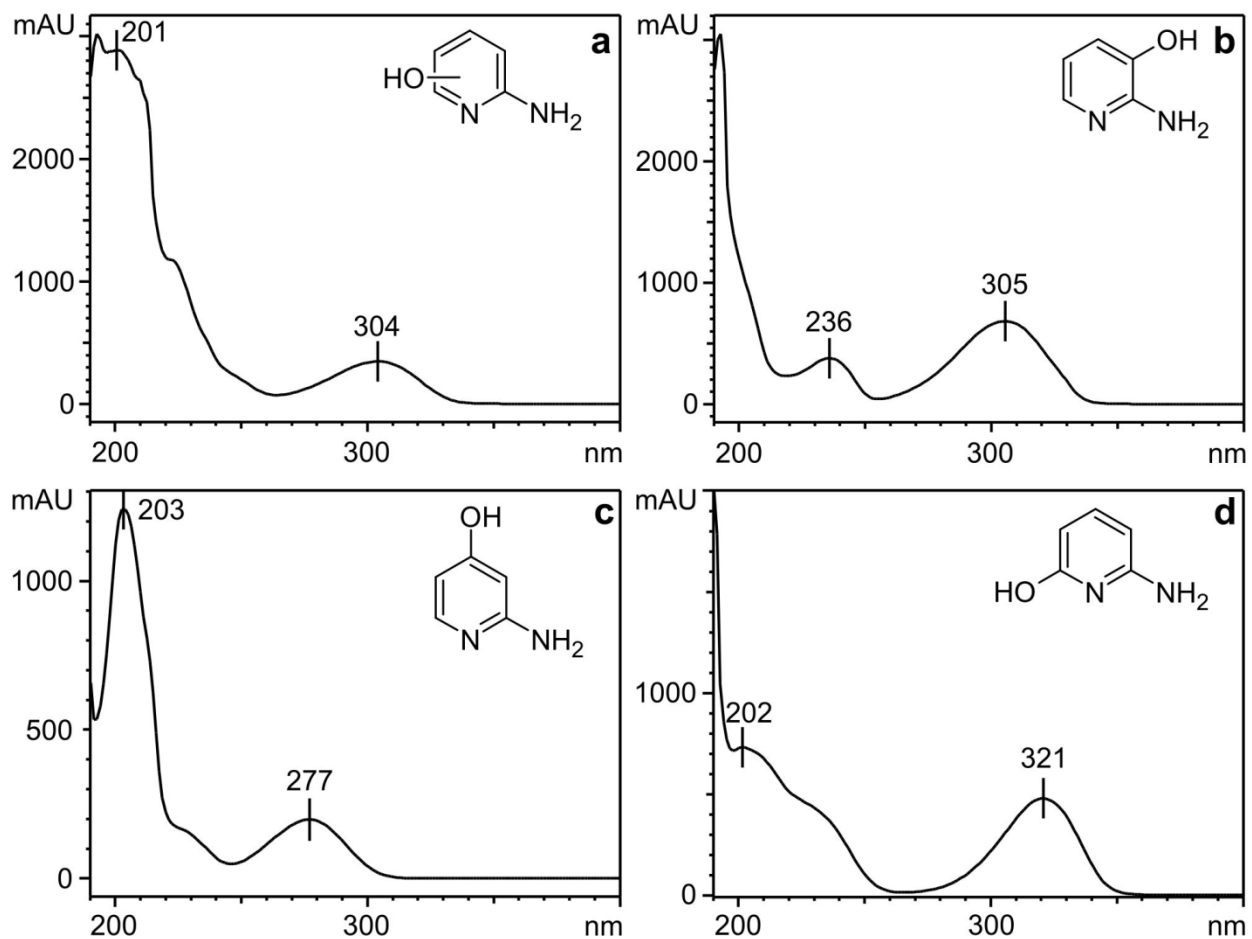

Figure S-IV. UV spectra of 2-aminohydroxypyridines. The UV spectrum of (a) 2-aminopyridine hydroxylated by *Burkholderia* sp. MAK1 cells and UV spectra of (b) 2-amino-3-hydroxypyridine, (c) 2-amino-4-hydroxypyridine, (d) 2-amino-6-hydroxypyridine standard solutions. The spectra were obtained by HPLC-MS. Note: the standard of 2-aminopyridin-5-ol is commercially unavailable.

Table S-1. Biochemical characterization of *Burkholderia* sp. MAK1.

According to API™ ZYM test (bioMérieux, USA), *Burkholderia* sp. MAK1 is alkaline phosphatase (2-naphthyl phosphate), esterase (C 4) (2-naphthyl butyrate), esterase (C 8) (2-naphthyl caprylate), leucine arylamidase (L-leucyl-2-naphthylamide), acid phosphatase (2-naphthyl phosphate), naphthol-AS-BI-phosphohydrolase (naphthol-AS-BI-phosphate),  $\beta$ -galactosidase (2-naphthyl- $\beta$ -D-galactopyranoside), and *N*-acetyl- $\beta$ -glucosaminidase (1-naphthyl-*N*-acetyl- $\beta$ -D-glucosaminide) positive. *Burkholderia* sp. MAK1 cells show weak activities of lipase (C 14) (2-naphthyl myristate), valine arylamidase (L-valyl-2-naphthylamide), cystine arylamidase (L-cystyl-2-naphthylamide),  $\alpha$ -galactosidase (6-Br-2-naphthyl- $\alpha$ -D-galactopyranoside),  $\alpha$ -glucosidase (2-naphthyl- $\alpha$ -D-glucopyranoside), and  $\alpha$ -fucosidase (2-naphthyl- $\alpha$ -L-fucopyranoside). The microorganism is negative for trypsin (*N*-benzoyl-DL-arginine-2-naphthylamide),  $\alpha$ -chymotrypsin (*N*-glutaryl-phenylalanine-2-naphthylamide),  $\beta$ -glucuronidase (naphthol-AS-BI- $\beta$ -D-glucuronide),  $\beta$ -glucosidase (6-Br-2-naphthyl- $\beta$ -D-glucopyranoside), and  $\alpha$ -mannosidase (6-Br-2-naphthyl- $\alpha$ -D-mannopyranoside).

According to API™ 50 CH test (bioMérieux, USA), *Burkholderia* sp. MAK1 is able to metabolize the following carbohydrates: D-arabinose, L-arabinose, D-xylose, D-galactose, D-glucose, D-fructose, D-mannose, L-rhamnose, dulcitol, inositol, D-mannitol, D-sorbitol, *N*-acetylglucosamine, amygdalin, esculin ferric citrate, salicin, D-cellobiose, D-maltose, D-lactose, D-melibiose, D-saccharose, D-trehalose, inulin, D-raffinose, amidon (starch), glycogen, xylitol, gentiobiose, D-turanose, D-lyxose, D-tagatose, D-fucose, D-arabitol, and potassium gluconate.

*Burkholderia* sp. MAK1 cells grow on D-glucose (0.1 %), D-galactose (0.1 %), *myo*-inositol (0.1 %), D-mannitol (0.1 %), D-mannose (0.1 %), D-sorbitol (0.1 %), D-fructose (0.1 %), D-xylose (0.1 %), succinate (0.1 %), and 2-hydroxypyridine (0.1 %) as sole carbon source but not on D-trehalose, D-ribose, 2-deoxy-D-glucose, D-melibiose, D-melezitose, sucrose, D-raffinose, D-maltose, D-cellobiose, and D-maltotriose.

Table S-2. The list of compounds which were tested as potential substrates for transformation by whole cells of *Burkholderia* sp. MAK1.

| Substrate                  |                                                                                     |                    | Product                                            |
|----------------------------|-------------------------------------------------------------------------------------|--------------------|----------------------------------------------------|
| Name                       | Structure                                                                           | [M+H] <sup>+</sup> | [M+H] <sup>+</sup>                                 |
| Pyridin-2-ol               | 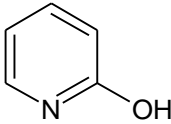   | 96                 | Substrate consumption occurs, no products detected |
| Pyridin-2-amine            |    | 95                 | 111                                                |
| 2-Methylpyridine           |    | 94                 | 110                                                |
| 2-Chloropyridine           |  | 114                | 130                                                |
| Pyridine-2-carboxylic acid |  | 124                | No reaction observed                               |
| 2-Pyridylmethanol          |  | 110                | 126<br>Slow transformation                         |
| 2-Ethylpyridine            |  | 108                | 124                                                |

|                                     |                                                                                     |             |                                                    |
|-------------------------------------|-------------------------------------------------------------------------------------|-------------|----------------------------------------------------|
| Pyridine-2-thiol                    | 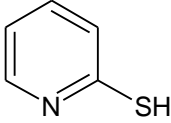   | 112         | -                                                  |
| 1-Methylpyridin-2-one               |    | 110         | 126                                                |
| Pyridin-2-ol <i>N</i> -oxide        |    | 112         | Substrate consumption occurs, no products detected |
| Pyridine- <i>N</i> -oxide           |    | 96          | -                                                  |
| Pyridin-3-ol                        |  | 96          | 112                                                |
| 3-Bromopyridin-2-ol                 |  | 174 and 176 | Substrate consumption occurs, no products detected |
| 3-Methylpyridin-2-ol                |  | 110         | Substrate consumption occurs, no products detected |
| 2-Hydroxypyridine-3-carboxylic acid |  | 140         | -                                                  |

|                                 |                                                                                     |                                      |                                                    |
|---------------------------------|-------------------------------------------------------------------------------------|--------------------------------------|----------------------------------------------------|
| 3-Methoxypyridin-2-ol           | 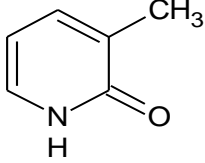   | 126                                  | -                                                  |
| Pyridin-2,3-diol                |    | 112                                  | Substrate consumption occurs, no products detected |
| 3-Methylpyridin-2-amine         |    | 109                                  | 125                                                |
| 3-Methylpyridine-2-carbonitrile |    | 119                                  | -                                                  |
| 2,3-Dimethylpyridine            |   | 108                                  | 124<br>Traces of the product                       |
| 2-Aminopyridin-3-ol             |  | 111                                  | 215                                                |
| 2-Aminopyridine-3-carbonitrile  |  | 161 (as a cluster with acetonitrile) | -                                                  |
| Pyridin-2,3-diamine             |  | 110                                  | 214                                                |
| 3-Nitropyridin-2-amine          |  | 140                                  | 156                                                |



|                               |                                                                                     |     |                                                                |
|-------------------------------|-------------------------------------------------------------------------------------|-----|----------------------------------------------------------------|
| 4-Methyl-3-nitro-pyridin-2-ol | 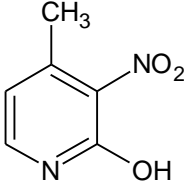   | 155 | 125                                                            |
| Pyridin-2,4-diol              |    | 112 | 128                                                            |
| Pyridin-2,6-diol              |    | 112 | Substrate consumption occurs, blue color, no products detected |
| 6-Methyl-pyridin-2-ol         |   | 110 | Substrate consumption occurs, no products detected             |
| Pyrimidin-2-ol                |  | 97  | -                                                              |
| 4-Methylpyridin-2-amine       |  | 109 | 125                                                            |
| 4,6-Dimethylpyridin-2-amine   |  | 123 | -                                                              |
| 3-Methylpyridin-6-amine       |  | 109 | 125<br>Slow transformation                                     |

|                         |                                                                                     |     |                              |
|-------------------------|-------------------------------------------------------------------------------------|-----|------------------------------|
| Pyridine                | 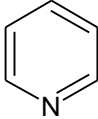   | 80  | 96                           |
| 3-Methylpyridine        |    | 94  | 110                          |
| 4-Methylpyridine        |    | 94  | 110                          |
| 2,4-Dimethylpyridine    |    | 108 | 124                          |
| 2,5-Dimethylpyridine    |   | 108 | 124                          |
| 2,6-Dimethylpyridine    |  | 108 | -                            |
| 3,4-Dimethylpyridine    |  | 108 | 124                          |
| 3,5-Dimethylpyridine    |  | 108 | 124                          |
| 2,3,5-Trimethylpyridine |  | 122 | 138<br>Traces of the product |

|                                               |                                                                                     |     |                                                    |
|-----------------------------------------------|-------------------------------------------------------------------------------------|-----|----------------------------------------------------|
| 2,4,6-Trimethylpyridine                       | 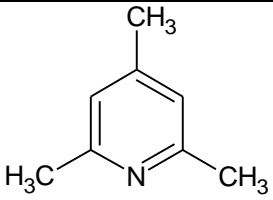   | 122 | -                                                  |
| Pyran-2-one                                   |    | 97  | Substrate consumption occurs, no products detected |
| 2-Hydroxy-6-oxo-1H-pyridine-4-carboxylic acid |    | 156 | -                                                  |
| 1-Propylpyridin-2(1 <i>H</i> )-one            |   | 138 | 154<br>Traces of the product                       |
| 6-Hydroxypyridine-2-carboxylic acid           |  | 140 | -                                                  |
| 1-Butylpyridin-2(1 <i>H</i> )-one             |  | 152 | -                                                  |

|                                           |                                                                                     |     |                                                     |
|-------------------------------------------|-------------------------------------------------------------------------------------|-----|-----------------------------------------------------|
| 5-Hydroxypyridine-2-carboxylic acid       | 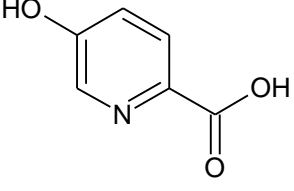   | 140 | -                                                   |
| 2-Hydroxy-6-methylpyridine-3-carbonitrile |    | 135 | Substrate consumption is slow, no products detected |
| Pyridin-2,6-diamine                       |    | 110 | Substrate consumption occurs, no products detected  |
| Pyrazine                                  |    | 81  | 97;<br>113                                          |
| 1-Pyrazin-2-ylethanone                    |  | 288 | 125                                                 |
| 2,3-Dimethylpyrazine                      |  | 109 | 125<br>Traces of the product                        |
| 2,5-Dimethylpyrazine                      |  | 109 | 125<br>Traces of the product                        |
| 2,6-Dimethylpyrazine                      |  | 109 | 125                                                 |

|                                 |                                                                                     |     |                              |
|---------------------------------|-------------------------------------------------------------------------------------|-----|------------------------------|
| 2,3,5-Trimethylpyrazine         | 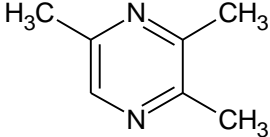   | 123 | 139<br>Traces of the product |
| Pyrazin-2-amine                 |    | 96  | 112                          |
| Tetramethylpyrazine             |    | 137 | -                            |
| Pyridin-2-ol N-oxide            |    | 110 | -                            |
| 2-(2-Pyridyl)ethanol            |   | 124 | 140<br>Slow transformation   |
| 3-Methylpyridazine              |  | 95  | -                            |
| 2-Methylpyridin-3-ol            |  | 110 | 126                          |
| 4-Methylpyridine-2-carbonitrile |  | 119 | -                            |

|                                               |                                                                                     |                       |     |
|-----------------------------------------------|-------------------------------------------------------------------------------------|-----------------------|-----|
| Pyridine-2,6-dicarbonitrile                   | 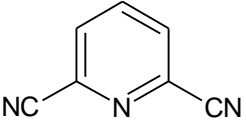   | No substrate detected | -   |
| 4-Ethylpyridine                               |    | 108                   | 124 |
| 6,7-Dihydro-5H-cyclopenta[b]pyridine          |    | 120                   | 136 |
| 5-Methyl-6,7-dihydro-5H-cyclopenta[b]pyrazine |    | 135                   | -   |
| Pyrimidin-2,4-diamine                         |   | 111                   | 127 |
| 2-Methylpyridin-5-ol                          |  | 110                   | -   |
| 6-Hydroxypyridine-2-carboxylic acid           |  | 140                   | -   |
| 3-Hydroxypyridine-2-carboxylic acid           |  | 140                   | -   |

|                                   |                                                                                     |     |     |
|-----------------------------------|-------------------------------------------------------------------------------------|-----|-----|
| 1-Ethylpyridin-2(1 <i>H</i> )-one | 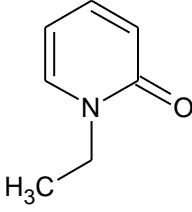   | 124 | 140 |
| Pyridine-3-carboxamide            |    | 123 | 140 |
| 4-[(4-Nitrophenyl)methyl]pyridine |    | 215 | -   |
| Pyridine-4-carboxylic acid        |   | 124 | -   |
| Pyridine-3-carbonitrile           |  | 105 | 121 |
| Pyridine-2,3-dicarboxylic acid    |  | 168 | -   |
| Pyridin-4-ol                      |  | 96  | -   |

|                                  |                                                                                     |                       |                                                           |
|----------------------------------|-------------------------------------------------------------------------------------|-----------------------|-----------------------------------------------------------|
| 3-Fluoropyridin-2-ol             | 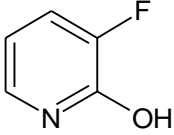   | 114                   | Substrate consumption occurs, no products detected        |
| 3-Chloropyridin-2-ol             |    | 130                   | Substrate consumption occurs, no products detected        |
| 6-Chloropyridin-2-ol             |    | 130                   | Substrate consumption occurs, green, no products detected |
| 6-Bromopyridin-2-ol              |    | 174 and 176           | Substrate consumption occurs, green, no products detected |
| 2-Aminopyridin-6-ol              |  | 111                   | Substrate consumption occurs, several products formed     |
| 4-Chloropyridin-2-ol             |  | 130                   | -                                                         |
| 2-Oxo-1H-pyridine-4-carbonitrile |  | No substrate detected | -                                                         |



|                                  |                                                                                     |             |                                                    |
|----------------------------------|-------------------------------------------------------------------------------------|-------------|----------------------------------------------------|
| 4,6-Dimethylpyridin-2-ol         | 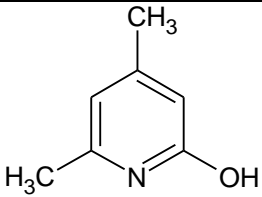   | 124         | -                                                  |
| 3-Amino-6-methyl-pyridin-2-ol    |    | 125         | 279                                                |
| 3-(Trifluoromethyl) pyridin-2-ol |    | 164         | [M-H] <sup>-</sup> :<br>178                        |
| 4-(Trifluoromethyl) pyridin-2-ol |    | 165         | -                                                  |
| 6-(Trifluoromethyl) pyridin-2-ol |   | 165         | Substrate consumption occurs, no products detected |
| 4-Chloropyridin-2-amine          |  | 129         | 145                                                |
| 6-Bromopyridin-2-amine           |  | 173 and 175 | 189 and 191                                        |
| 6-Chloropyridin-2-amine          |  | 129         | 145                                                |

|                                    |                                                                                     |                       |                                                    |
|------------------------------------|-------------------------------------------------------------------------------------|-----------------------|----------------------------------------------------|
| 3-Bromopyridin-2-amine             | 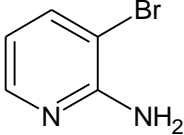   | 173 and 175           | 189 and 191                                        |
| 6-Fluoropyridin-2-amine            |    | 113                   | Substrate consumption occurs, no products detected |
| 2-Aminopyridine-4-ol               |    | 111                   | -                                                  |
| 3-Chloropyridin-2-amine            |    | 129                   | 145                                                |
| 4-Fluoropyridin-2-amine            |   | 113                   | 129                                                |
| 3,6-Dibromopyridin-2-amine         |  | No substrate detected | ?                                                  |
| 3-Methoxypyridin-2-amine           |  | 125                   | -                                                  |
| 6-Methoxypyridin-2-amine           |  | 125                   | -                                                  |
| 6-(Trifluoromethyl)pyridin-2-amine |  | -                     | -                                                  |

|                                     |                                                                                     |             |                                               |
|-------------------------------------|-------------------------------------------------------------------------------------|-------------|-----------------------------------------------|
| Ethyl 2-aminopyridine-3-carboxylate | 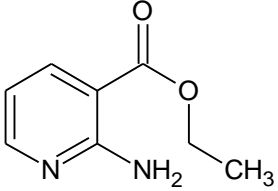   | 167         | 183<br>Traces of the product                  |
| 2-Aminopyrimidin-4-ol               |    | 112         | 128                                           |
| 4-Chloropyrimidin-2-amine           |    | 130         | 146<br>Traces of the product                  |
| 4-Bromopyridin-2-amine              |   | 173 and 175 | 189 and 191                                   |
| 4-Bromopyridin-2-ol                 |  | 174 and 176 | -                                             |
| 3-Fluoropyridin-2-amine             |  | 113         | 129<br>Two peaks with the same molecular mass |
| 3-Bromo-6-methylpyridine-2-ol       |  | 188 and 190 | -                                             |

|                                  |                                                                                                                                                                                                                                                                                                                                                                                                                                                                                                                   |     |   |
|----------------------------------|-------------------------------------------------------------------------------------------------------------------------------------------------------------------------------------------------------------------------------------------------------------------------------------------------------------------------------------------------------------------------------------------------------------------------------------------------------------------------------------------------------------------|-----|---|
| 4-Methyl-3-nitro-pyridin-2-amine | 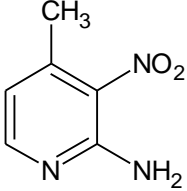 <p>The image shows the chemical structure of 4-methyl-3-nitro-pyridin-2-amine. It consists of a pyridine ring with a nitrogen atom at the bottom. A methyl group (CH<sub>3</sub>) is attached to the carbon at the top position (C4). A nitro group (NO<sub>2</sub>) is attached to the carbon at the top-right position (C3). An amino group (NH<sub>2</sub>) is attached to the carbon at the bottom-right position (C2).</p> | 154 | - |
|----------------------------------|-------------------------------------------------------------------------------------------------------------------------------------------------------------------------------------------------------------------------------------------------------------------------------------------------------------------------------------------------------------------------------------------------------------------------------------------------------------------------------------------------------------------|-----|---|

Table S-3. The efficiency of conversion of selected compounds by whole cells of *Burkholderia* sp. MAK1.

| Name                                 | Structure                                                                            | Conversion, % |
|--------------------------------------|--------------------------------------------------------------------------------------|---------------|
| Pyridin-2-amine                      | 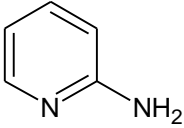   | 99            |
| 2-Pyridylmethanol                    |    | 21            |
| Pyridin-2,3-diol                     |    | 97            |
| Pyridin-2,3-diamine                  |    | 88            |
| Pyridin-2,6-diamine                  |   | 94            |
| 2,6-Dimethylpyrazine                 |  | 63            |
| 2-(2-Pyridyl)ethanol                 |  | 17            |
| 2-Methylpyridin-3-ol                 |  | 2             |
| 4-Ethylpyridine                      |   | 10            |
| 6,7-Dihydro-5H-cyclopenta[b]pyridine |  | 13            |

|                                   |                                                                                      |    |
|-----------------------------------|--------------------------------------------------------------------------------------|----|
| Pyrimidin-2,4-diamine             | 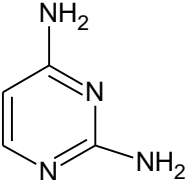   | 31 |
| 1-Ethylpyridin-2(1 <i>H</i> )-one |    | 17 |
| Pyridine-3-carbonitrile           |    | 27 |
| 3-Amino-6-methyl-pyridin-2-ol     |    | 88 |
| 3-(Trifluoromethyl)pyridin-2-ol   |   | 46 |
| 4-Chloropyridin-2-amine           |  | 96 |
| 6-Bromopyridin-2-amine            |  | 53 |
| 6-Chloropyridin-2-amine           |  | 89 |
| 3-Bromopyridin-2-amine            |  | 48 |
| 3-Chloropyridin-2-amine           |  | 88 |

|                         |                                                                                    |    |
|-------------------------|------------------------------------------------------------------------------------|----|
| 4-Fluoropyridin-2-amine | 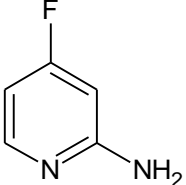 | 70 |
| 2-Aminopyrimidin-4-ol   |  | 95 |
| 4-Bromopyridin-2-amine  |  | 48 |
| 3-Fluoropyridin-2-amine |  | 43 |
